# Supplementary material
Source: MDPI journal article supplement (https://www.mdpi.com/2073-4395/12/11/2782)
Supplement: s1 [file s1 › agronomy-2007960-supplementary.pdf]

## Supplementary Material

# The effect of *Sinapis alba* mustard seed meal extract on potato tuber quality in organic potato production

Daniel Temmen <sup>1</sup>, John Randall <sup>1</sup> and Inna Popova <sup>1,2,\*</sup>

<sup>1</sup> Department of Soil & Water Systems, University of Idaho,  
Moscow, ID 83844, USA

<sup>2</sup> Department of Soil Sciences, University of Wisconsin,  
Madison, WI 53706, USA

\* Correspondence: ipopova@wisc.edu

Table S1. Potato plants above ground biomass and tuber yields after *S. alba* extract treatment for greenhouse and field trials. Data are average for six individual plants (greenhouse study) or five plots (field study). Values within the same set followed by a common letter are not significantly different ( $P \leq 0.05$ ).

|                           | Averages<br>potato cross-<br>section, cm <sup>2</sup> | Number of<br>potatoes | Yields, g             | Above ground<br>biomass, g |
|---------------------------|-------------------------------------------------------|-----------------------|-----------------------|----------------------------|
| <i>Greenhouse trial</i>   |                                                       |                       |                       |                            |
| Non-treated control       | 79.3±18.2 <sup>a</sup>                                | 10.8±2.3 <sup>a</sup> | 466±46 <sup>a</sup>   | 42.0±13.4 <sup>b</sup>     |
| At planting               | 31.2±3.0 <sup>b</sup>                                 | 10.8±4.6 <sup>a</sup> | 129±61 <sup>b</sup>   | 55.0±9.8 <sup>a</sup>      |
| 2 weeks after<br>planting | 31.2±3.8 <sup>b</sup>                                 | 13.6±3.0 <sup>a</sup> | 171±65 <sup>b</sup>   | 53.4±4.7 <sup>ab</sup>     |
| 4 weeks after<br>planting | 25.7±10.6 <sup>b</sup>                                | 13.0±3.4 <sup>a</sup> | 130±39 <sup>b</sup>   | 51.6±5.5 <sup>ab</sup>     |
| <i>Field trial</i>        |                                                       |                       |                       |                            |
| Non-treated control       | 65.6±19.8 <sup>a</sup>                                | 27.0±7.8 <sup>a</sup> | 948±546 <sup>a</sup>  | 110.9±52.4 <sup>a</sup>    |
| 1×                        | 40.4±20.8 <sup>b</sup>                                | 21.4±3.6 <sup>a</sup> | 475±519 <sup>ab</sup> | 70.8±55.8 <sup>ab</sup>    |
| 2×                        | 25.8±4.2 <sup>c</sup>                                 | 11.8±3.8 <sup>b</sup> | 139±39 <sup>b</sup>   | 47.0±20.3 <sup>b</sup>     |
| 3×                        | 46.7±18.0 <sup>b</sup>                                | 14.0±7.2 <sup>b</sup> | 315±461 <sup>b</sup>  | 50.3±40.2 <sup>b</sup>     |
